# Supplementary material
Source: publisher figshare collection journal article supplement (https://tandf.figshare.com/ndownloader/files/21806967)
Supplement: Supplementary file 1 [file 21806967]

Table S1: Results of criteria hierarchies (eigenvectors) for each interviewed stakeholder

|                     | Municipal sanitation services provider | State water agency | State Institute of Environment | Municipal Secretariat of Environment | State Secretariat of Environment | National Health Foundation | Private Companies | Academic Sector | Community |
|---------------------|----------------------------------------|--------------------|--------------------------------|--------------------------------------|----------------------------------|----------------------------|-------------------|-----------------|-----------|
| Population coverage | 40%                                    | 49%                | 27%                            | 9%                                   | 6%                               | 32%                        | 43%               | 41%             | 29%       |
| Flow rate           | 28%                                    | 32%                | 37%                            | 19%                                  | 18%                              | 54%                        | 18%               | 23%             | 33%       |
| Energy consumption  | 19%                                    | 8%                 | 23%                            | 19%                                  | 25%                              | 5%                         | 28%               | 21%             | 23%       |
| Implementation cost | 13%                                    | 11%                | 14%                            | 54%                                  | 51%                              | 9%                         | 11%               | 15%             | 15%       |

Table S2: The hierarchy order of the criteria evaluated by the group of stakeholders

| Hierarchy Order | Criterion           | Eigenvector |
|-----------------|---------------------|-------------|
| 1°              | Flow rate           | 31%         |
| 2°              | Population coverage | 30%         |
| 3°              | Implementation cost | 20%         |
| 4°              | Energy consumption  | 19%         |
